# Supplementary material for: Homogeneous polyporus polysaccharide inhibits bladder cancer by polarizing macrophages to M1 subtype in tumor microenvironment
Source: PubMed Central journal article supplement (PMC8152148; doi:10.1186/s12906-021-03318-x), 2021-05-25

Control AZD1480

Phospho-JAK2

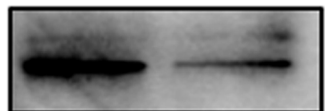

125KD

Phospho-NF-kB P65

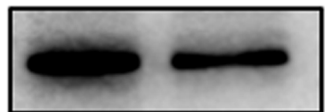

65KD

Phospho-IKBA

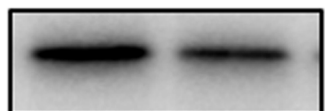

40KD

Phospho-JAK2

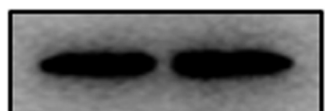

37KD

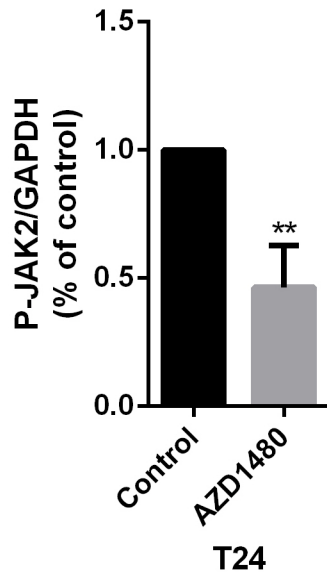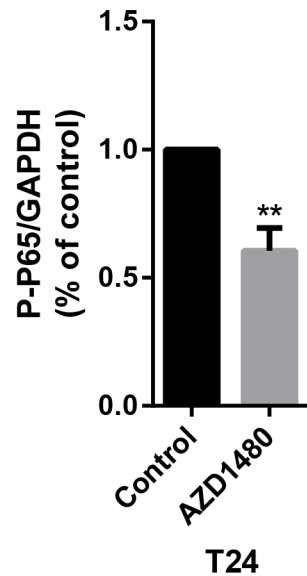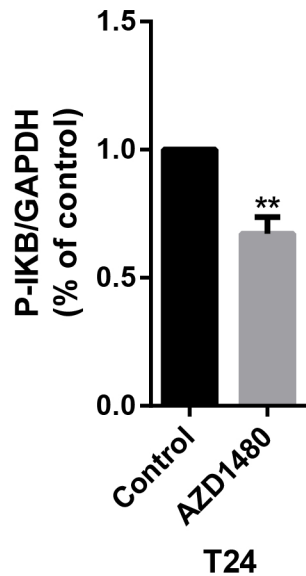

Supplement: 12906_2021_3318_MOESM1_ESM.pdf [file 12906_2021_3318_MOESM1_ESM.pdf]
