# Supplementary material for: Homogeneous polyporus polysaccharide inhibits bladder cancer by polarizing macrophages to M1 subtype in tumor microenvironment
Source: PubMed Central journal article supplement (PMC8152148; doi:10.1186/s12906-021-03318-x), 2021-05-25

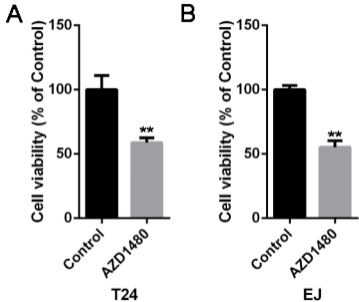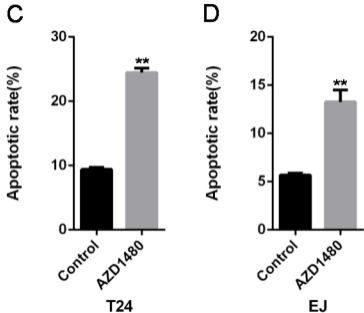

Supplement: 12906_2021_3318_MOESM3_ESM.pdf [file 12906_2021_3318_MOESM3_ESM.pdf]
